# Supplementary material for: Pentacyclic triterpenoid-rich fraction of the Hardy kiwi (Actinidia arguta) improves brain dysfunction in high fat diet-induced obese mice
Source: PubMed Central journal article supplement (PMC7113284; doi:10.1038/s41598-020-62810-5), 2020-04-01
Supplement: 41598_2020_62810_MOESM1_ESM.pdf [file 41598_2020_62810_MOESM1_ESM.pdf]

**Pentacyclic triterpenoid-rich fraction of the Hardy kiwi (*Actinidia arguta*)  
improves brain dysfunction in high fat diet-induced obese mice**

Jeong Su Ha<sup>1,#</sup>, Jin Yong Kang<sup>1,#</sup>, Jeong Eun Kang<sup>1</sup>, Seon Kyeong Park<sup>1</sup>, Jong Min Kim<sup>1</sup>,  
Chul-Woo Kim<sup>2</sup>, Sung-Il Oh<sup>2</sup>, Uk Lee<sup>2</sup>, Dae-Ok Kim<sup>3</sup> and Ho Jin Heo<sup>1,\*</sup>

---

**\*Corresponding author:** Division of Applied Life Science (BK21 plus), Institute of Agriculture and Life Science, Gyeongsang National University, Jinju 52828, Republic of Korea. Tel: +82 55 772 1907; Fax: +82 55 772 1909. E-mail address: hjher@gnu.ac.kr (H. J. Heo).

<sup>1</sup>*Division of Applied Life Science (BK21 plus), Institute of Agriculture and Life Science, Gyeongsang National University, Jinju 52828, Republic of Korea*

<sup>2</sup>*Division of Special Forest Products, National Institute of Forest Science, Suwon 16631, Republic of Korea*

<sup>3</sup>*Department of Food Science and Biotechnology, Kyung Hee University, Yongin, 17104, Republic of Korea*

JSH: orengewater@naver.com, JYK: kangjy2132@naver.com, JEK: kjd940225@naver.com, SKP: tjrsrud2510@naver.com, JMK: myrock201@naver.com, CWK: futuretree@korea.kr, SIO: osi0919@korea.kr, UL: rich26@korea.kr, DOK: dokim05@khu.ac.kr, HJH: hjher@gnu.ac.kr

<sup>#</sup>Jeong Su Ha and Jin Yong Kang are co-first authors

Supplementary information

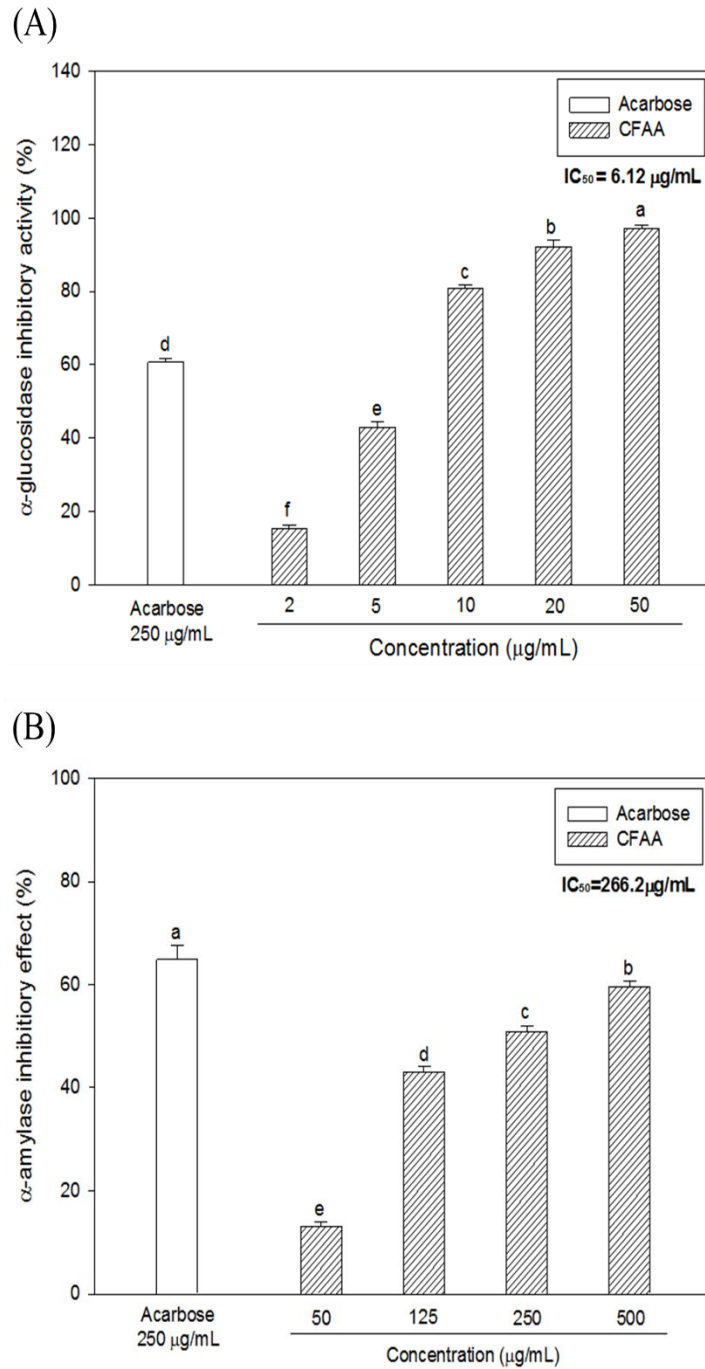

**Figure S1. Effect of chloroform fraction from *Actinidia arguta* (CFAA) on α-glucosidase activity (A) and α-amylase activity (B).** Data were analyzed using ANOVA with Duncan's SAS and expressed as mean ± SD ( $n=6$ ). Data were statistically considered at  $p<0.05$ , and different small letters represent statistical difference.
